# Supplementary material for: The Manufacture of GMP-Grade Bone Marrow Stromal Cells with Validated In Vivo Bone-Forming Potential in an Orthopedic Clinical Center in Brazil
Source: Hindawi journal article supplement (doi:10.1155/2019/2608482), 2019-11-07
Supplement: f1 [file 2608482.f1.pdf]

# **The manufacture of GMP-grade bone marrow stromal cells with validated in vivo bone-forming potential in an orthopedic clinical center in Brazil**

Rhayra B. Dias<sup>1,2</sup>, João A. M. Guimarães<sup>2,3</sup>, Marco B. Cury<sup>4</sup>, Leonardo R. Rocha<sup>2,3</sup>, Elaine S. da Costa<sup>5</sup>, Liebert P. Nogueira<sup>6</sup>, Camila Hochman-Mendez<sup>7,8</sup>, Anneliese Fortuna-Costa<sup>2</sup>, Anna Karoline F. Silva<sup>9</sup>, Karin S. Cunha<sup>9</sup>, Sergio A. L. de Souza<sup>10</sup>, Maria Eugênia L. Duarte<sup>2</sup>, Rafaela C. Sartore<sup>2</sup>, Danielle C. Bonfim<sup>2</sup>.

## **Supplementary Material**

**Supplementary Figure 1:** Immunophenotypic characterization of BMSC products. Figure “a” shows representative flow cytometry histograms used to obtain the percentage of cells expressing the surface marker in question. In “b”, it is shown the gating strategy for the simultaneous analysis of CD73, CD90, CD105, and CD146 surface markers.

**Supplementary Figure 2:** Quantifications of the mineralized nodules positive for Von Kossa stain, the number of vacuoles with intracellular lipid accumulation positive for Oil Red O, and cartilaginous matrix positive for Masson’s Trichrome stain.

**Supplementary Figure 3:** Negative controls of the immunohistochemistry analysis showing no recognition of mouse collagen Type I and Lamin A/C by the primary antibodies designed to recognize the given human proteins.

**Supplementary Figure 4:** Reconstruction of bone implants by micro-CT. The images showing the contrast generated in the microCT images in function of the density, the thickness and the energy of the x-rays, that were used to discriminate the new bone and the HA/TCP scaffold.

**Supplementary Table 1:** List of all reagents and materials used.

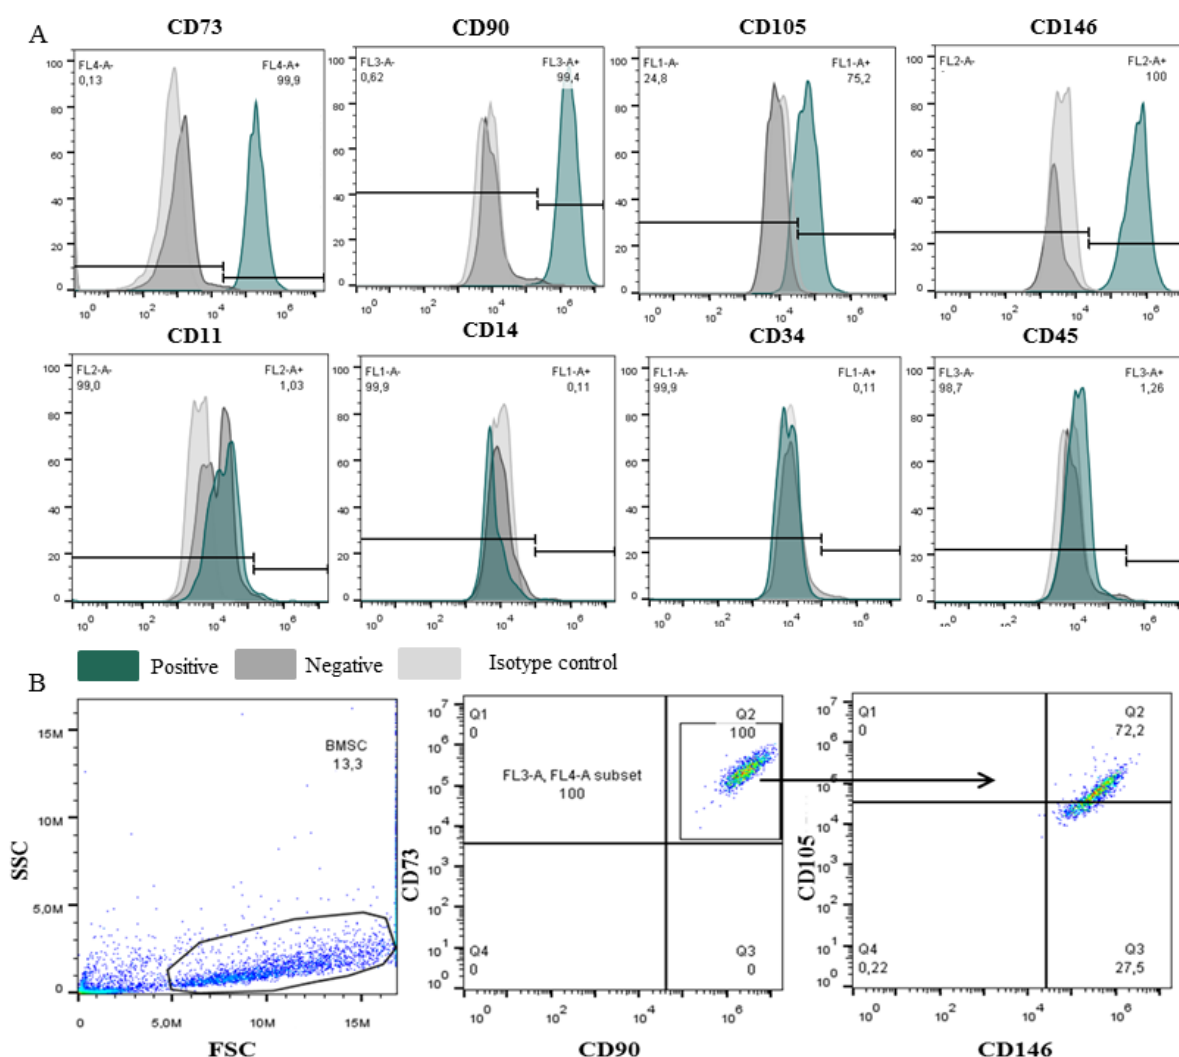

**Supplementary Figure 1. Immunophenotypic profile of the BMSCs.** (a) Representative flow cytometry histograms (from the BMSC 14 sample) showing the percentages of cells expressing CD90, CD73, CD105, CD146, CD11b, CD14, CD34 and CD45 (green) compared to the corresponding isotypes (dark gray) and unlabeled cells (light gray). (b) Representative flow cytometry plots showing the percentages of cells simultaneously expressing CD73, CD90, CD105 and CD146 (from the BMSC 15 sample).

To quantify the extent of mineralization and the number of fat accumulating cells, wells were photographed using an inverted microscope (Nikon Eclipse TS100). The mineralized area in 10-15 random fields was quantified using the NIH Image J software (NIH, Maryland, USA) and was represented as the percentage of the total area. The number of fat accumulating cells was expressed as the number of cells with intracellular lipid accumulation per field of view in 10 random fields. In the chondrogenic differentiation, images of 2-3 histological sections containing the whole micromass area were acquired with a 4X objective using the RGB-mode illumination on an EVOS M5000 microscope (Thermofischer scientific). The Fiji plugin Trainable Weka Segmentation (NIH software) was used for the quantitative measurement of the cartilaginous area according to the Masson's Trichrome stain.

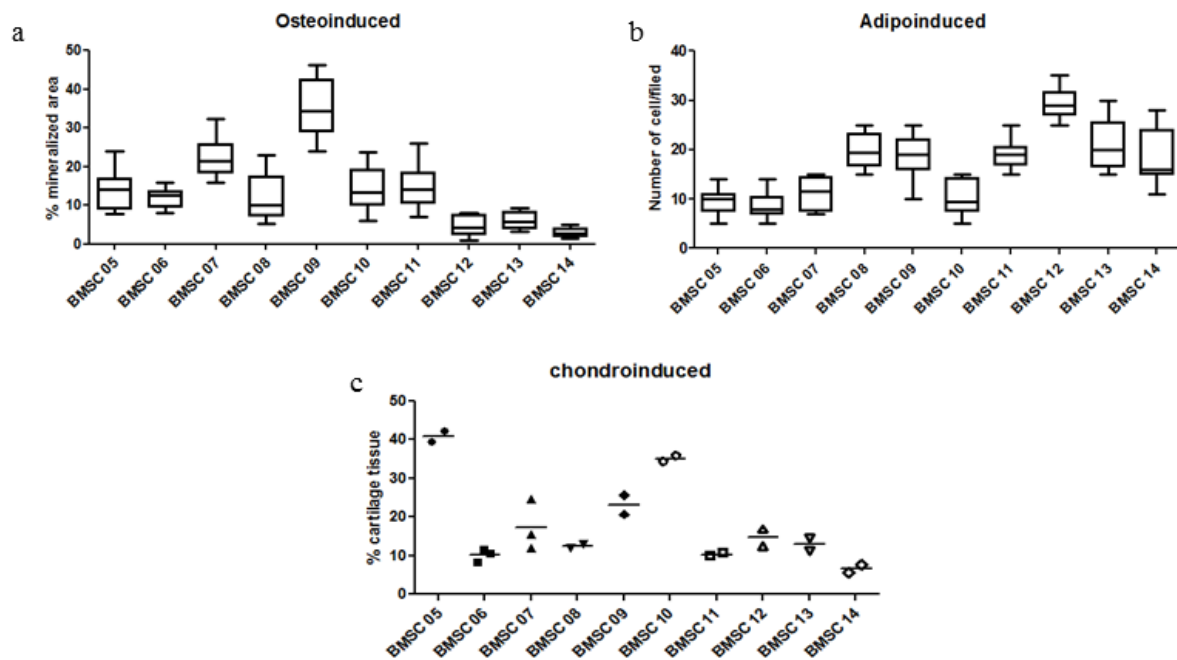

**Supplementary Figure 2. Quantification of the extent of in vitro osteogenic, adipogenic, and chondrogenic differentiation.** (a) Percent of the mineralized area positive for Von Kossa stain. (b) Number of cells with intracellular lipid accumulation positive for Oil Red O. (c) Percent of cartilaginous area positive for Masson's Trichrome stain.

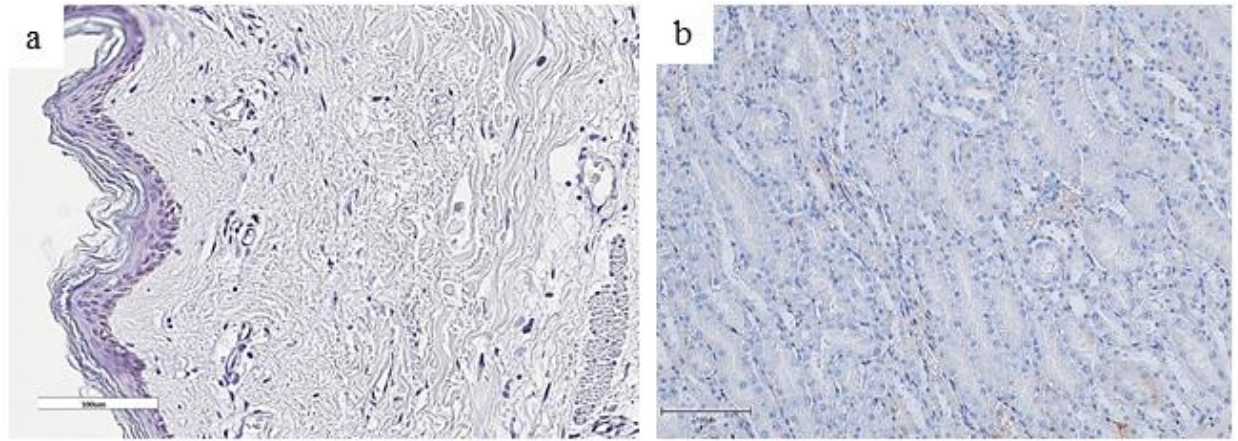

**Supplementary Figure 3. Immunohistochemical analysis of collagen I and lamin A/C.** Negative controls showing no staining with the primary antibodies against human collagen I in mouse skin (a) and human lamin A/C in mouse kidney (b).

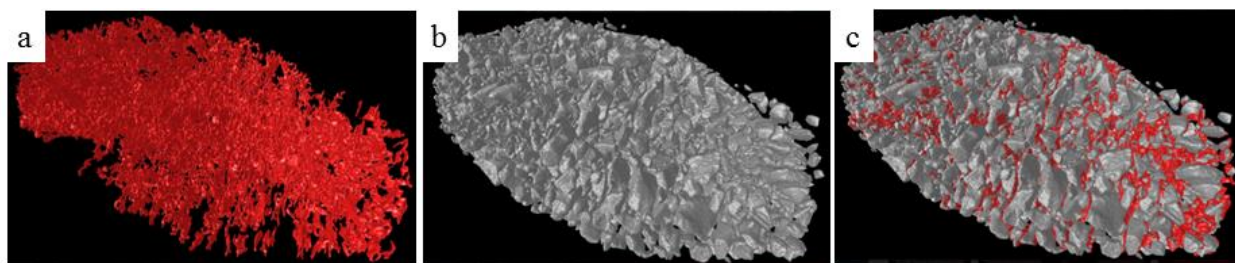

**Supplementary Figure 4. 3D reconstruction of micro-CT images.** red = new bone; gray = HA/TCP scaffold. Representative images of n = 9 experiments.

Table S1. List of reagents and materials

| <b>Reagent</b>                     | <b>Source</b>              | <b>Identifier</b> | <b>Related information</b>   |
|------------------------------------|----------------------------|-------------------|------------------------------|
| 2-layer cell factories             | Corning Incorporated       | CLS3310           | -                            |
| 10-layer cell factories            | Corning Incorporated       | CLS3312           | -                            |
| T-75 flask                         | Corning Incorporated       | CLS3275           | -                            |
| Mr. Frosty freezing container      | Sigma-Aldrich              | C1562             | -                            |
| 3-Isobutyl-1-methylxanthine        | Sigma-Aldrich              | I7018             | BioUltra, ≥99%* <sup>1</sup> |
| Alexa Fluor 546 secondary antibody | Invitrogen - Thermo Fisher | A11010            | -                            |
| Anti-lamin A/C                     | Bosterbio                  | M00438            | -                            |
| Anti-collagen type II              | Santa Cruz                 | sc-288887         | -                            |
| Anti-collagen type I               | Abcam                      | ab90395           | -                            |
| IgG2A-FITC                         | Santa Cruz                 | SC-2856           | -                            |
| IgG1A-APC                          | Santa Cruz                 | SC-2888           | -                            |
| IgG1A-Percp-Cy5.5                  | Santa Cruz                 | SC-45123          | -                            |
| IgG1-PE                            | Santa Cruz                 | SC-2877           | -                            |
| IgG1-FITC                          | Santa Cruz                 | SC-2855           | -                            |
| IgG2A-PE                           | Santa Cruz                 | SC-2867           | -                            |
| Anti-CD90-Percp-Cy5.5              | Biolegend                  | 328118            | -                            |
| Anti-CD73-APC                      | Biolegend                  | 560847            | -                            |
| Anti-CD105-FITC                    | Biolegend                  | 120405            | -                            |
| Anti-CD146-PE                      | Biolegend                  | 342004            | -                            |
| Anti-CD14-FITC                     | Immunostep                 | EP-12-15173       | -                            |
| Anti-CD34-FITC                     | Dako Agilent               | PNIM1870U         | -                            |
| Anti-CD45-Percp-Cy5.5              | Dako Agilent               | PNIM2653U         | -                            |
| Anti-CD11b-PE                      | Santa Cruz                 | SC-65429          | -                            |

|                                 |                |                   |                                            |
|---------------------------------|----------------|-------------------|--------------------------------------------|
| Ascorbic acid 2-phosphate       | Sigma-Aldrich  | 795437            | ACS <sup>*2</sup>                          |
|                                 |                |                   | IVD <sup>*3</sup>                          |
| BACTEC plus aerobic             | BD             | 442023            | ANVISA registration<br>MS10033430658       |
|                                 |                |                   | IVD                                        |
| BACTEC plus anaerobic           | BD             | 442022            | ANVISA registration<br>MS10033430658       |
| Bovine serum albumin            | Sigma-Aldrich  | A1470             | BioReagent, ≥98% <sup>*4</sup>             |
| Bovine transferrin kit          | Abnova         | A1470             | -                                          |
| DAPI                            | Santa Cruz     | sc-3598           | -                                          |
| Dexamethasone                   | Sigma-Aldrich  | D9184             | USP <sup>*5</sup>                          |
|                                 |                |                   | BioReagent, ≥99.7%                         |
| Dimethylsulfoxide               | Sigma-Aldrich  | D2650             | Sterile and tested for endotoxin<br>levels |
| EDTA                            | Sigma-Aldrich  | E4884             | ACS                                        |
| EnVision FLEX Systems           | Dako Agilent   | K800221-2         | IVD                                        |
| Fetal bovine serum              | Gibco          | 26140079          | Qualified <sup>*6</sup>                    |
| Fibrinogen                      | Sigma-Aldrich  | F3879             | -                                          |
| Glacial acetic acid             | Sigma-Aldrich  | 1005706           | USP                                        |
|                                 |                |                   | Clinical grade                             |
| Human albumin                   | CSL Behring    | 102568ah          | ANVISA registration MS<br>1.0151.0122      |
|                                 |                |                   | Clinical grade                             |
| Insulin                         | Lilly          | D.C.B. 04918      | ANVISA registration MS<br>1.1260.0057      |
|                                 |                |                   | Clinical grade                             |
| Hydroxyethyl starch<br>solution | Fresenius Kabi | 1400391FFX-<br>30 | ANVISA registration M.S.<br>1.0041.0099    |
| Indomethacin                    | Sigma-Aldrich  | I8280             | USP                                        |
| Masson's Trichrome              | EasyPath       | EP-11-20013       | IVD                                        |

|                              |                   |            |                                                    |
|------------------------------|-------------------|------------|----------------------------------------------------|
| MycoAlert™ Kit               | Lonza             | LT07-118   | -                                                  |
| Nitric acid                  | VETEC             | V800282    | ACS                                                |
| Oil Red O                    | Sigma-Aldrich     | O0625      | Certified by the Biological Stain Commission       |
| Osteoset®                    | Wright Medical    | 130764-4   | Clinical grade                                     |
| Paraformaldehyde             | Sigma-Aldrich     | P6148      | Reagent grade                                      |
| PBS                          | Amresco           | VWRV0780   | Ultra Pure grade                                   |
|                              |                   |            | IVD                                                |
| Pyrogen™-5000                | Lonza             | N383       | ANVISA registration MS 80670780002                 |
| Propylene glycol             | Sigma-Aldrich     | P4347      | USP                                                |
| Recombinant trypsin          | Gibco-Thermo      | 12605010   | Animal Origin-Free <sup>*7</sup>                   |
| Ringer's lactate             | Fresenius Kabi    | PR228F2    | Clinical grade<br>M.S. 1.0041.0103                 |
| Silver nitrate               | Sigma-Aldrich     | 209139     | ACS                                                |
| Sodium citrate               | Sigma-Aldrich     | 1613859    | USP                                                |
| StemPro® chondrogenic medium | Gibco             | A1007101   | RUO <sup>*8</sup>                                  |
| Human Thrombin               | Sigma-Aldrich     | T9326      | BioUltra, ≥95%                                     |
| α-MEM                        | LGC Biotechnology | BR30007-05 | Endotoxin level: < 10 EU/m and Mycoplasma Negative |
| β-glycerophosphate           | Sigma-Aldrich     | G9422      | BioUltra, ≥ 99%                                    |

\*1: According to Sigma-Aldrich, BioUltra reagents are the “finest quality products for life science, with the most stringent testing protocols and highest purity. Superior manufacturing methods and product specific testing protocols are designed to ensure quality to our highest standard. Tests may include, but are not limited to, purity by gel electrophoresis, trace metal testing and application testing”.

\*2: ACS reagents meets or exceeds purity standards set by the American Chemical Society (ACS). This grade is acceptable for food, drug, or medicinal use and can be used for ACS applications or for general procedures that require stringent quality specifications and a purity of ≥95%

\*3: IVD, in vitro diagnostic use

\*4: Base grade products, suitability tested for specific applications such as molecular biology or cell culture.



\*5: USP grade meets or exceeds requirements of the United States Pharmacopeia (USP). This grade is acceptable for food, drug, or medicinal use.

\*6: ISO 13485 certified, processed in FDA registered facilities. Labeled for in-vitro diagnostics (compliant with highest level of USP sterility testing) Endotoxin level: < 10 EU/mL, Hemoglobin level: < 25 mg/dL

\*7: Manufacturing is compliant with cGMP requirements

\*8: Research use only. Regularly tested for endotoxin levels and sterility, according to the USP. Endotoxin Level:  $\leq 50$  EU/ml and serum Free
